# Supplementary material
Source: PubMed Central journal article supplement (PMC7594917)
Supplement: NIHMS1638167-supplement-Supplemental_Material.pdf [file NIHMS1638167-supplement-Supplemental_Material.pdf]

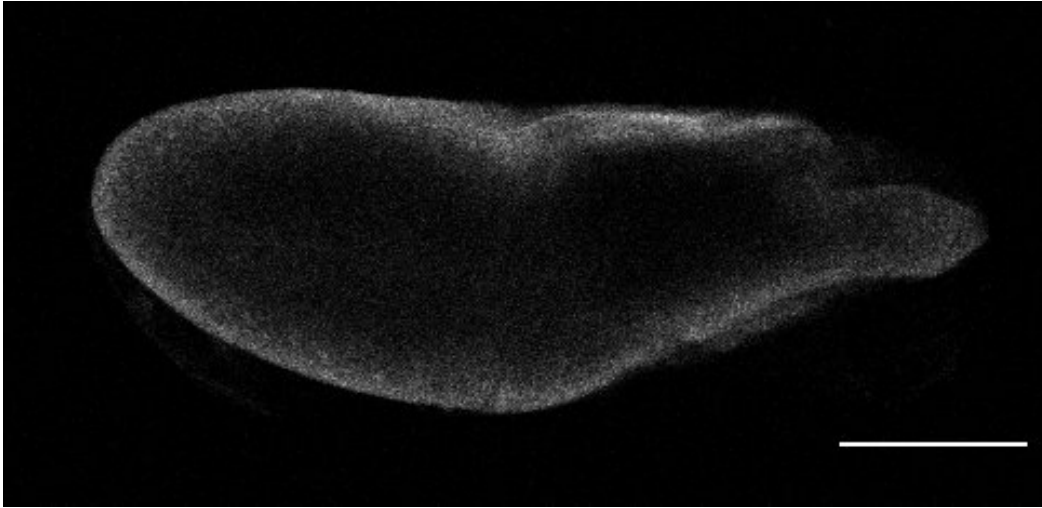

**Figure.S1 Localization of Trpm in wildtype mature oocytes.** Representative image of anti-Trpm staining of a mature oocyte from ORP2 wildtype females. Scale bar = 100  $\mu$ m.

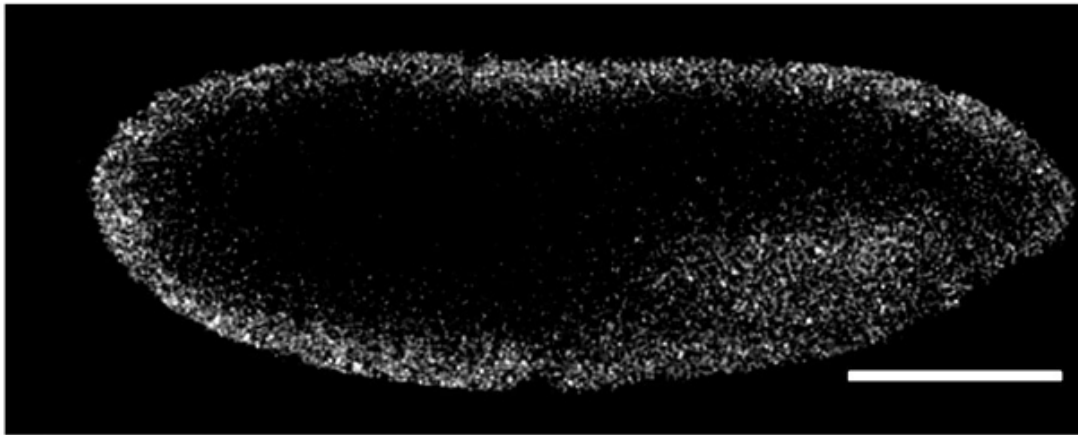

**Figure.S2 Localization of Trpm in *kmr* mutant oocytes.** Representative images of anti-Trpm staining in mature oocytes from *kmr<sup>2</sup>* (n=13) females. Scale bar = 100  $\mu$ m.

### **Movie S1 (separate file)**

Calcium waves in spherical oocytes from homozygous *kugelei*<sup>N103-2</sup> mutant females, detected with *nos-GCaMP6m*.

20 FPS

160 frames

1 sec per frame

### **Movie S2 (separate file)**

Calcium rise induced by a microneedle at the anterior pole of wildtype oocytes, detected with *mata4-GAL4-VP16 > UASp-GCaMP3*.

5 FPS

20 frames

10 sec per frame

### **Movie S3 (separate file)**

Calcium rise induced by a microneedle at the waist of wildtype oocytes, detected with *mata4-GAL4-VP16 > UASp-GCaMP3*.

5 FPS

39 frames

10 sec per frame

### **Movie S4 (separate file)**

Calcium rise induced by a microneedle at the posterior pole of wildtype oocytes, detected with *mata4-GAL4-VP16 > UASp-GCaMP3*.

5 FPS

20 frames

10 sec per frame

**Movie S5 (separate file)**

Calcium waves in oocytes from heterozygous *kmr<sup>1</sup>* females, detected with *nos-GCaMP6m*. False color LUT was used to make the calcium wave more evident.

36 FPS

360 frames

1 sec per frame

**Movie S6 (separate file)**

Calcium waves in oocytes from homozygous *kmr<sup>1</sup>* females, detected with *nos-GCaMP6m*. False color LUT was used to make the calcium wave more evident.

20 FPS

20 frames

1 sec per frame
